# Supplementary material for: Remarkable adsorptive performance of a metal–organic framework, vanadium-benzenedicarboxylate (MIL-47), for benzothiophene
Source: Royal Society of Chemistry journal article supplement (doi:10.1039/c0cc04759g), 2010-12-10
Supplement: c0cc04759g.pdf [file c0cc04759g.pdf]

# **Remarkable Adsorptive Performance of a Metal-Organic Framework, Vanadium-benzenedicarboxylate (MIL-47), for Benzothiophene**

**Nazmul Abedin Khan,<sup>a</sup> Jong Won Jun,<sup>a</sup> Jong Hwa Jeong<sup>a</sup> and Sung Hwa Jhung<sup>a\*</sup>**

<sup>a</sup>*Department of Chemistry, Kyungpook National University, Daegu 702-701, Korea. Fax: 82-53-950-6330; E-mail: [sung@knu.ac.kr](mailto:sung@knu.ac.kr)*

## Supplementary Information

### Experimental procedures:

The MOFs (MIL-53(Al), MIL-53(Cr), MIL-47(V)) used in this study were synthesized hydrothermally under autogeneous pressure similar to the reported methods.<sup>1-3</sup> However, instead of conventional electric heating, microwaves (Mars-5, CEM) were used as a heating source in order to take advantage of rapid synthesis of porous materials under microwave irradiation. For the synthesis of MIL-53(Al), aluminum chloride hexahydrate ( $\text{AlCl}_3 \cdot 6\text{H}_2\text{O}$ , Sigma Aldrich, 99%), terephthalic acid (TPA,  $\text{C}_6\text{H}_4\text{-1,4-(CO}_2\text{H)}_2$ ; Sigma Aldrich, 98%) and deionized water were mixed in the molar ratio of 1Al:0.5TPA:80 $\text{H}_2\text{O}$ . The reaction mixtures containing TPA, aluminum chlorides and water were stirred for 5 min, loaded into a Teflon-lined autoclave, sealed and placed in the microwave oven and finally heated for 2.5 h at 200 °C under autogeneous pressure. The MIL-53(Cr) and MIL-47(V) were synthesized similarly from chromium (III) chloride hexahydrate ( $\text{CrCl}_3 \cdot 6\text{H}_2\text{O}$ , Sigma Aldrich, 96%) and vanadium (III) chloride ( $\text{VCl}_3$ , Sigma Aldrich, 97%), respectively. The reaction temperature and time were changed a bit for the syntheses of the two MOFs (MIL-53(Cr): 210 °C, 2 h; MIL-47: 175 °C, 2 h). After the synthesis, the MOF samples were recovered by cooling, filtration, water washing and drying. To remove TPA from the as-synthesized MOFs, purification was carried out with sonication using an ultrasonic generator (VC×750, max. power 750 W, Sonic & materials, Inc.) in the presence of *N,N*-dimethylformamide (DMF) following the reported purification method.<sup>4</sup> Briefly, 0.3 g of a MOF such as MIL-53(Al) was suspended in 20 ml of DMF and sonicated for 1 h at 70 °C. The purified MOFs were collected after filtration and dried at 150 °C for 5 h.

The phases of purified products were identified by analysis with an X-ray diffractometer (MO3X-HF, Model NO. 1031,  $\text{Cu}_{\text{K}\alpha}$  radiation) (Supporting Fig. 6). Before X-ray diffraction, MOFs were hydrated for 2 days over saturated ammonium chloride aqueous solution. The porosity of the Me-BDCs is analyzed with the nitrogen adsorption (Supporting Fig. 7). The nitrogen sorption was carried out using Micromeritics Tristar II 3020 adsorption unit at liquid nitrogen temperature (-196 °C) after evacuation at 150 °C for 15 h. Surface area and micropore volume were calculated with the BET equation and t-plot, respectively, using the nitrogen adsorption isotherms.

Before adsorption of benzothiophene, the adsorbents were dried overnight under vacuum at 150 °C and were kept in a desiccator to avoid adsorption of water vapor. The dried adsorbent was put in n-octane solutions having specific BT concentrations. After adsorption for a pre-determined time under magnetic stirring, the solution was separated from the adsorbents with a syringe filter (PTFE, hydrophobic, 0.5  $\mu\text{m}$ ). After separation, the solutions were analyzed for BT concentration using a GC (DS 6200, DS SCIENCE INC.) equipped with a FID detector and DB-5 column.

- 1 T. Loiseau, C. Serre, C. Huguenard, G. Fink, F. Taulelle, M. Henry, T. Bataille and G. Férey, *Chem. Eur. J.*, 2004, **10**, 1373.
- 2 C. Serre, F. Millange, C. Thouvenot, M. Noguès, G. Marsolier, D. Louër and G. Férey, *J. Am. Chem. Soc.*, 2002, **124**, 13519.
- 3 K. Barthelet, J. Marrot, D. Riou and G. Férey, *Angew. Chem. Int. Ed.*, 2002, **41**, 281.
- 4 E. Haque, N. A. Khan, J. E. Lee and S. H. Jung, *Chem. Eur. J.*, 2009, **15**, 11730.

### Calculations for kinetic and thermodynamic parameters:

The adsorption rate constant was calculated using pseudo-second order reaction kinetics.<sup>1,2</sup> Namely, the changes of adsorption amount with time are treated with the versatile pseudo-second-order kinetic model<sup>1,2</sup> because the whole data during adsorption time can be treated successfully:

$$dq_t / dt = k_2 (q_e - q_t)^2 \quad [\text{Eq. 1}]$$

$$\text{or, } \frac{t}{q_t} = \frac{1}{k_2 q_e^2} + \frac{1}{q_e} t \quad [\text{Eq. 2}]$$

Where,  $q_e$ : amount adsorbed at equilibrium (mg/g);

$q_t$ : amount adsorbed at time  $t$  (mg/g);

$t$ : adsorption time (h).

Therefore, the second order kinetic constant ( $k_2$ ) can be calculated by

$k_2 = \text{slope}^2 / \text{intercept}$  when the  $t/q_t$  is plotted against  $t$ .

The maximum adsorption capacity was calculated using the Langmuir adsorption isotherm<sup>1,3</sup> after adsorption for 24 h. The adsorption isotherms in various conditions have been plotted to follow the Langmuir equation:<sup>1,3</sup>

$$\frac{C_e}{q_e} = \frac{C_e}{Q_0} + \frac{1}{Q_0 b} \quad [\text{Eq. 3}]$$

Where,

$C_e$ : equilibrium concentration of adsorbate (mg/L)

$q_e$ : the amount of adsorbate adsorbed (mg/g)

$Q_0$ : Langmuir constant (maximum adsorption capacity) (mg/g)

$b$ : Langmuir constant (L/mg or L/mol)

So, the maximum adsorption capacity  $Q_0$  can be obtained from the *reciprocal of the slope* of a plot of  $C_e/q_e$  against  $C_e$ .

To get the thermodynamic parameters of adsorption such as  $\Delta G$  (free energy change),  $\Delta H$  (enthalpy change) and  $\Delta S$  (entropy change) the adsorption was further carried out at 35 and 45 °C. The Gibbs free energy change  $\Delta G$  can be calculated by the following equation 4:<sup>4,5</sup>

$$\Delta G = -RT \ln b \quad [\text{Eq. 4}] \quad (\text{where, R is gas constant})$$

The Langmuir constant  $b$  (dimension: L/mol) can be obtained from the *slope/intercept* of the Langmuir plot. The enthalpy change  $\Delta H$  and entropy change  $\Delta S$  can be obtained by using the van't Hoff equation:<sup>4,5</sup>

$$\ln b = \frac{\Delta S}{R} - \frac{\Delta H}{RT} \quad [\text{Eq. 5}]$$

The enthalpy change  $\Delta H$  and entropy change  $\Delta S$  were obtained from the (*-slope x R*) and (*intercept x R*), respectively, of the van't Hoff plot.

1 B. H. Hameed and A. A. Rahman, *J. Hazard. Mater.*, 2008, **160**, 576.

2 Y. S. Ho and G. McKay, *Process Biochem.*, 1999, **34**, 451.

3 S.-H. Lin and R.-S. Juang, *J. Environ. Manag.*, 2009, **90**, 1336.

4 (a) K. P. Singh, D. Mohan, S. Sinha, G. S Tondon and D. Gosh, *Ind. Eng. Chem. Res.*, 2003, **42**, 1965;

- (b) J.-H. Huang, K.-L. Huang, S.-Q. Liu, A.-T. Wang and C. Yan, *Colloid Surf. A: Physicochem. Eng. Aspects*, 2008, **33**, 55.
- 5 Z.-M. Ni, S.-J. Xia, L.-G. Wang, F.-F. Xing and G.-X. Pan, *J. Colloid Interface Sci.*, 2007, **316**, 284.
- 6 G. Crini and P.-M. Badot, *Prog. Polym. Sci.*, 2008, **33**, 399.

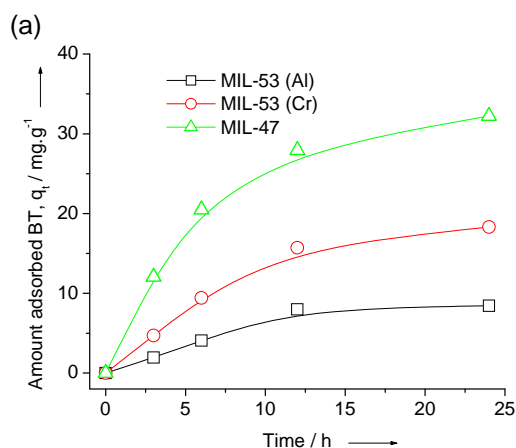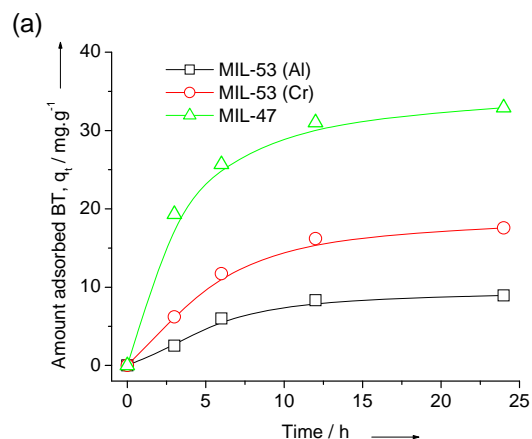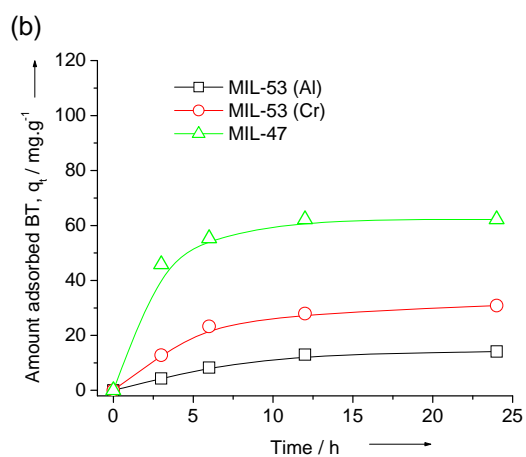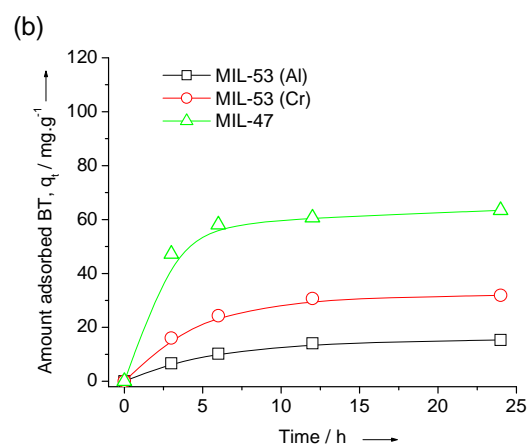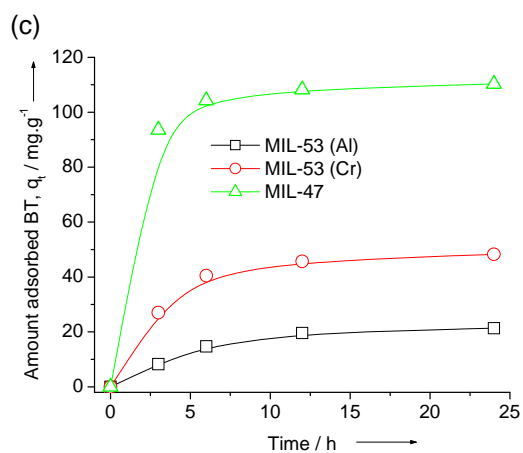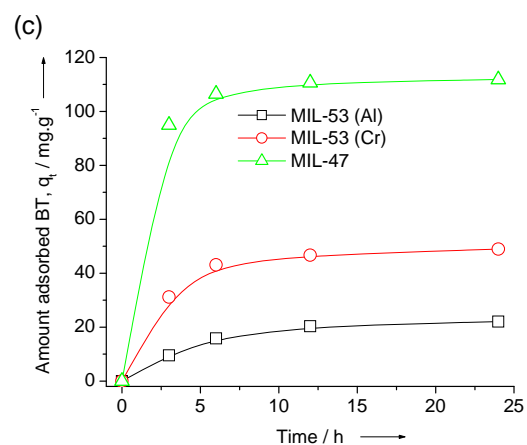

**Supplementary Fig. 1.** Effect of contact time and initial BT concentration on the adsorption of BT over the three adsorbents at 35 °C: (a)  $C_i = 250$  ppm; (b)  $C_i = 500$  ppm; (c)  $C_i = 1000$  ppm.

**Supplementary Fig. 2.** Effect of contact time and initial BT concentration on the adsorption of BT over the three adsorbents at 45 °C: (a)  $C_i = 250$  ppm; (b)  $C_i = 500$  ppm; (c)  $C_i = 1000$  ppm.

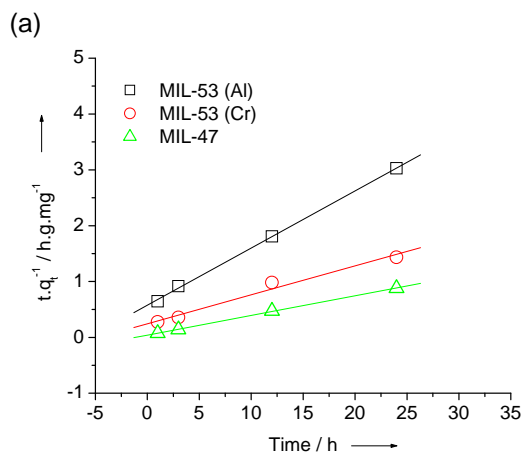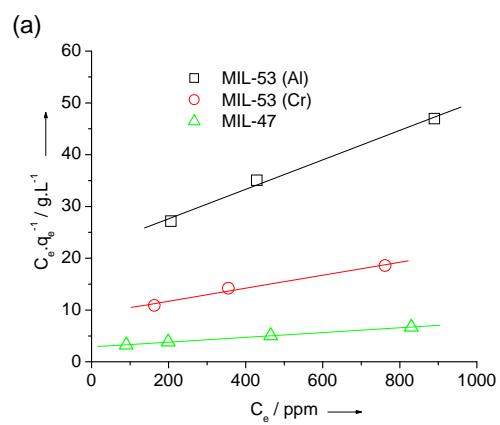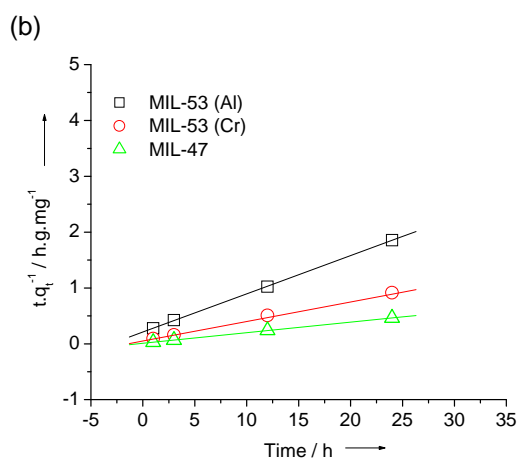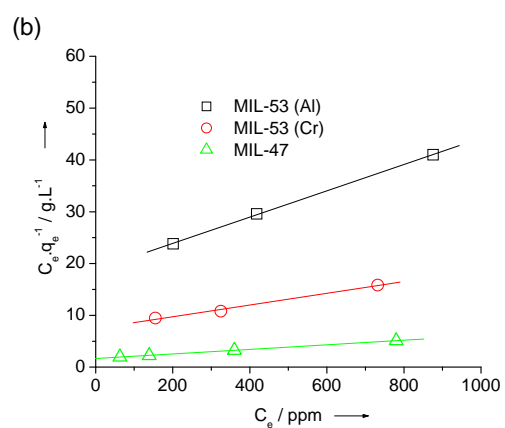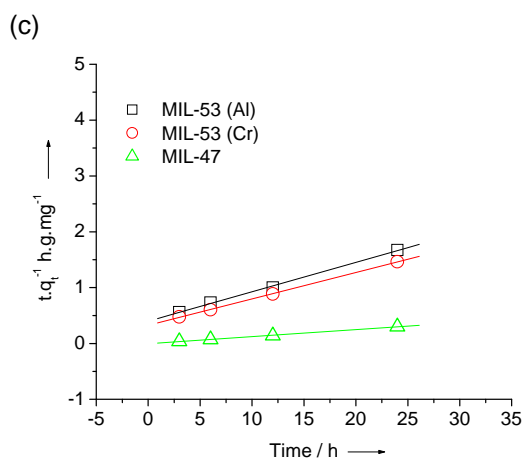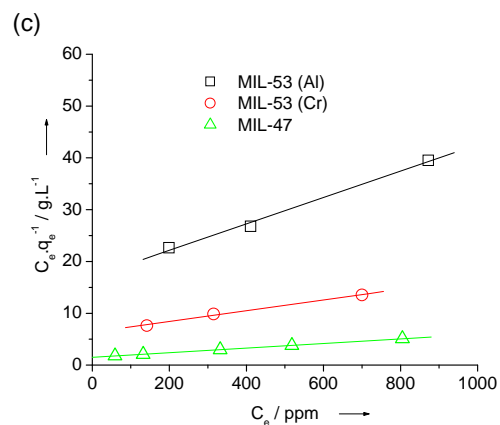

**Supplementary Fig. 3.** Plots of pseudo-second-order kinetics of BT adsorption over the three adsorbents at 25 °C: (a)  $C_i = 250$  ppm; (b)  $C_i = 500$  ppm; (c)  $C_i = 1000$  ppm.

**Supplementary Fig. 4.** Langmuir plots for BT adsorption over the three adsorbents at (a) 25 °C; (b) 35 °C and (c) 45 °C.

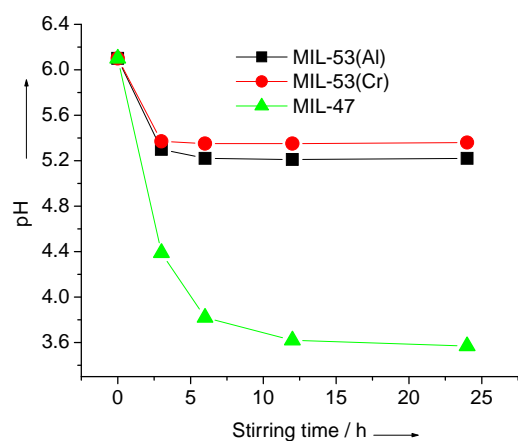

**Supplementary Fig. 5.** Changes of pH of aqueous slurry (0.02 g of Me-BDCs in 10.0 mL water) of three adsorbents with stirring time.

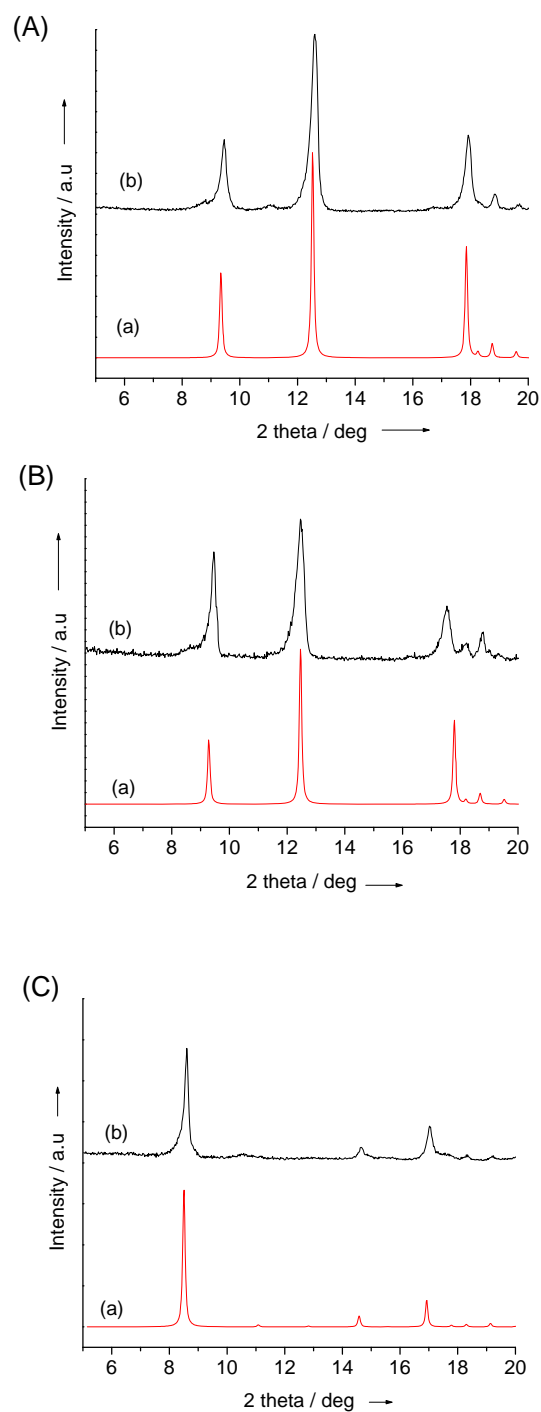

**Supplementary Fig. 6.** XRD patterns of the synthesized (A) MIL-53(Al), (B) MIL-53(Cr), (C) MIL-47. Plots (a) and (b) in each case represent the XRD patterns of simulated structure and synthesized sample, respectively. For the XRD measurement, the MOFs were hydrated after purification.

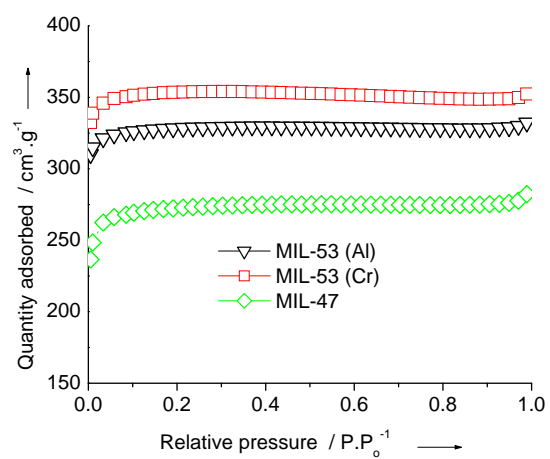

**Supplementary Fig. 7.** Nitrogen adsorption isotherms of the three adsorbents.
